# Supplementary material
Source: publisher figshare collection journal article supplement (https://gsajournals.figshare.com/ndownloader/files/22749152)
Supplement: Supplementary file 1 [file 22749152]

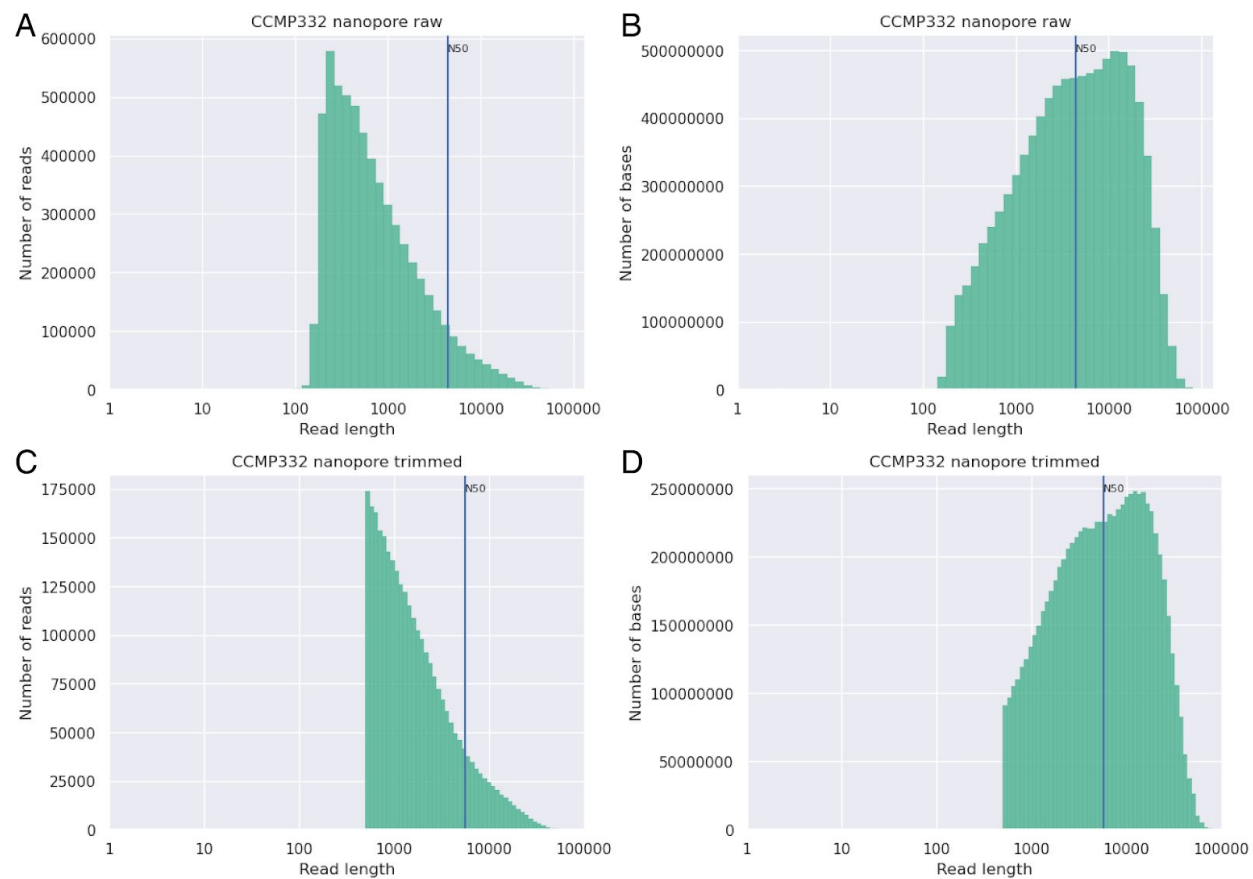

**Figure S1.** Read length histograms of the raw (A, B) and trimmed (C, D) nanopore reads.

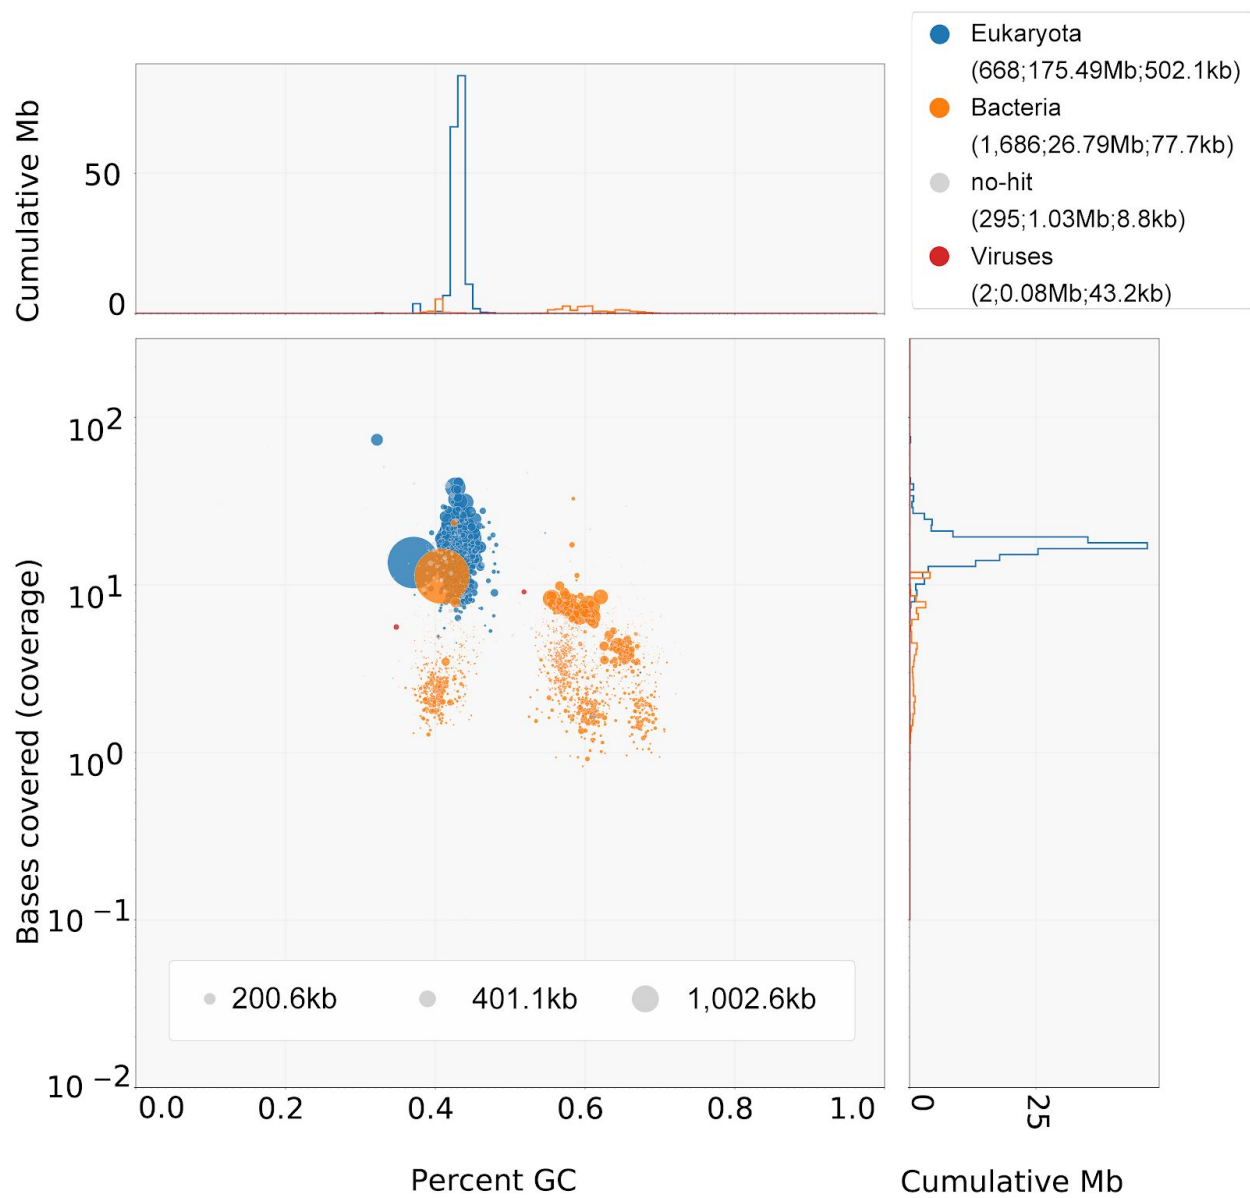

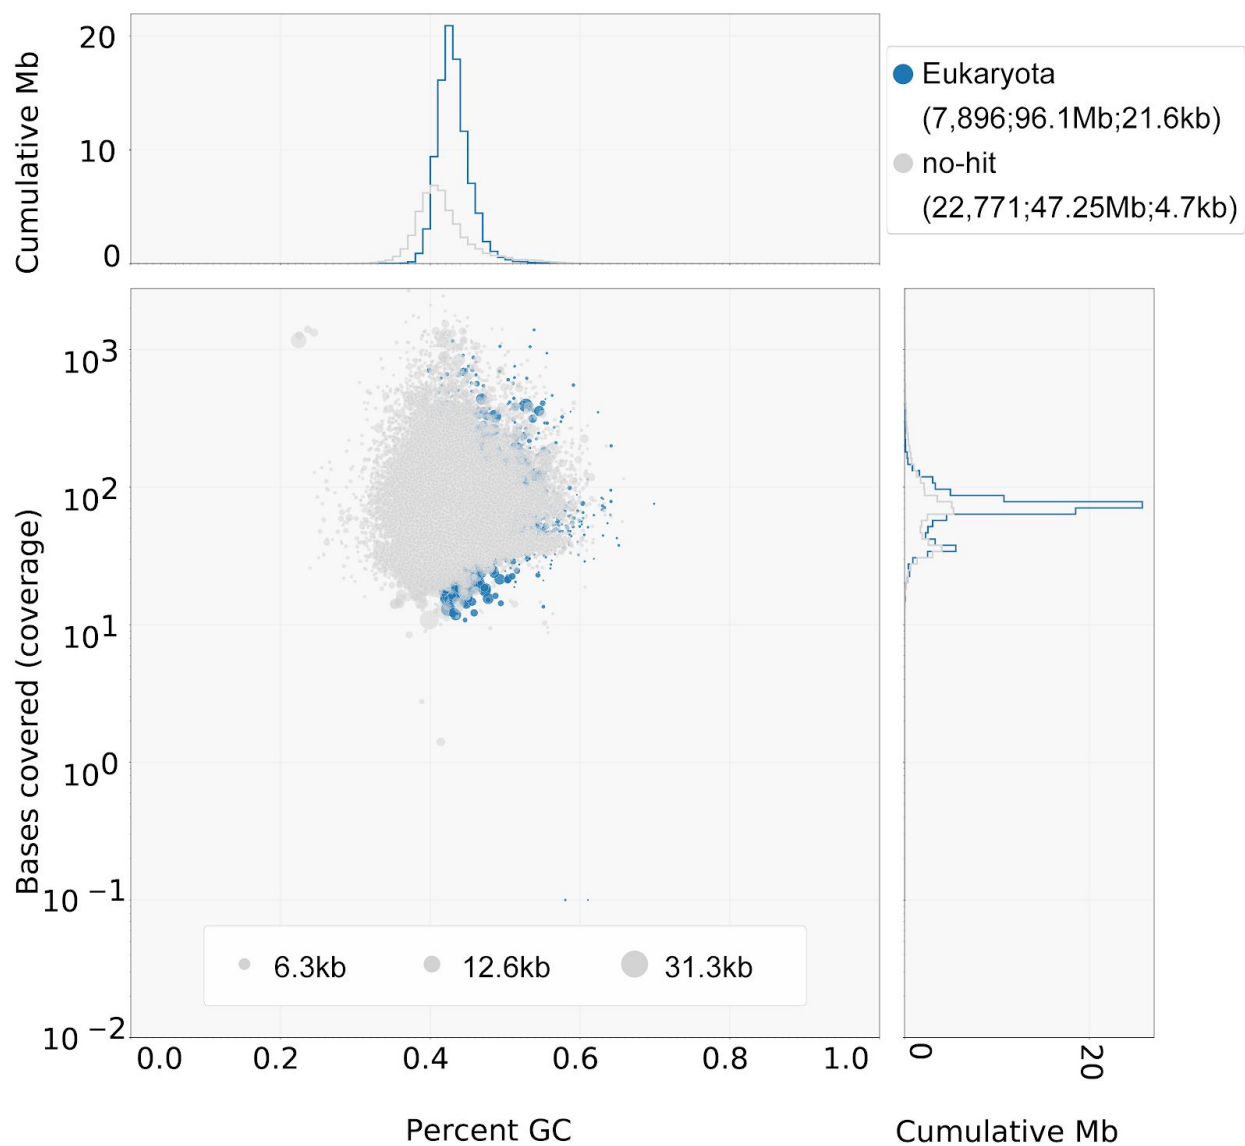

**Figure S3.** Blobplot showing the taxon-annotated GC content and coverage of the filtered *C. cryptica* ver. 1.0 assembly, after removing short (<1 kb) and contaminant scaffolds (taxonomic assignment to bacteria or viruses). Legend format: “superkingdom (number of scaffolds; total scaffold length; scaffold N50 length)”.
